# Supplementary material for: Molecular Basis for Variations in the Sensitivity of Pathogenic Rhodopsin Variants to 9-cis-Retinal
Source: bioRxiv or medRxiv preprint supplement (doi:10.1101/2022.03.01.482516), 2022-03-07
Supplement: Supplementary file [file media-1.pdf]

Supplementary Information for:

## **Molecular Basis for Variations in the Sensitivity of Pathogenic Rhodopsin Variants to 9-*cis*-Retinal**

Francis J. Roushar,<sup>1†</sup> Andrew G. McKee,<sup>1†</sup> Charles P. Kuntz,<sup>1</sup> Joseph T. Ortega,<sup>2</sup> Wesley D. Penn,<sup>1</sup> Hope Woods,<sup>3,4</sup> Laura M. Chamness,<sup>1</sup> Victoria Most,<sup>5</sup> Jens Meiler,<sup>3,5</sup> Beata Jastrzebska,<sup>2</sup> and Jonathan P. Schleba<sup>1\*</sup>

<sup>1</sup>*Department of Chemistry, Indiana University, Bloomington, Indiana, USA*

<sup>2</sup>*Department of Pharmacology, Case Western Reserve University, Cleveland, OH, USA*

<sup>3</sup>*Department of Chemistry, Vanderbilt University, Nashville, TN, USA*

<sup>4</sup>*Chemical and Physical Biology Program, Vanderbilt University, Nashville, TN, USA*

<sup>5</sup>*Institute for Drug Development, Leipzig University, Leipzig, SAC, Germany*

Keywords: Membrane Protein Folding, Rhodopsin, Proteostasis, Corrector, GPCR

†Authors contributed equally

\*Corresponding author E-mail address: [jschleba@indiana.edu](mailto:jschleba@indiana.edu)

### **Contents:**

-Figure S1

-Table S1

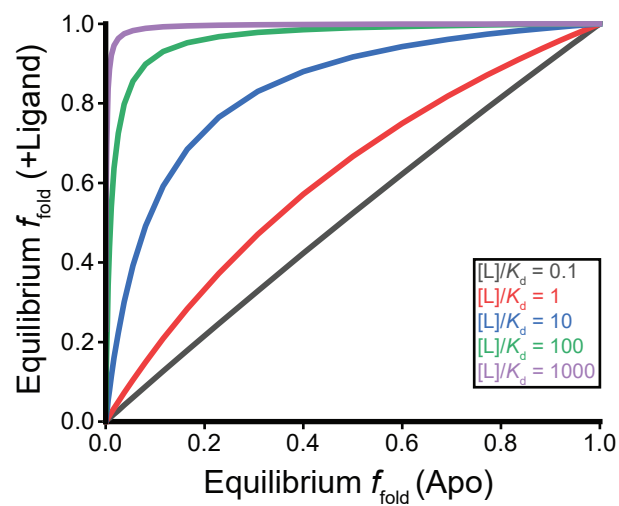

**Figure S1. Thermodynamic Relationship Between Ligand Binding on the Equilibrium Fraction of Folded Protein.** Equation 5 was used to simulate the impact of ligand binding on the equilibrium fraction of folded protein as a function of the ratio of ligand to its equilibrium dissociation constant. The equilibrium fraction of folded protein in the presence of ligand is plotted as a function of corresponding equilibrium fraction of folded apoprotein. This simulation reveals how the degree of rescue offered by a corrector should relate to the thermodynamic stability of the variant (x-coordinate), the concentration of the ligand, and its binding affinity.

**Table S1. Classification, Retinal-Sensitivity, and Plasma Membrane Expression (PME) of Mutations in Rhodopsin**

| Mutation | Prior Classification     | DMS Classification | Surface Immunostaining Intensity (Apo)* | Surface Immunostaining Intensity (+Ret)* |
|----------|--------------------------|--------------------|-----------------------------------------|------------------------------------------|
| T4K      | Class 2 <sup>1,2</sup>   | Non-Class 2        | 21459 ± 1373                            | 19838 ± 3633                             |
| P12R     | Unclassified             | Moderate Class 2   | 3044 ± 30                               | 5245 ± 834                               |
| N15S     | Class 2 <sup>1</sup>     | Severe Class 2     | 2058 ± 88                               | 2473 ± 303                               |
| T17M     | Class 2 <sup>1-3</sup>   | Severe Class 2     | 2211 ± 75                               | 2604 ± 227                               |
| V20G     | Class 2 <sup>1</sup>     | Severe Class 2     | 2251 ± 91                               | 2774 ± 268                               |
| P23H     | Class 2 <sup>1-3</sup>   | Severe Class 2     | 1716 ± 7                                | 2133 ± 171                               |
| P23L     | Class 2 <sup>1</sup>     | Severe Class 2     | 1585 ± 55                               | 1988 ± 255                               |
| P23A     | Class 2 <sup>1</sup>     | Severe Class 2     | 2295 ± 24                               | 2920 ± 275                               |
| Q28H     | Class 2 <sup>1,2</sup>   | Severe Class 2     | 1905 ± 82                               | 2236 ± 102                               |
| Q28R     | Class 2 <sup>1</sup>     | Severe Class 2     | 1826 ± 51                               | 2203 ± 117                               |
| M39R     | Class 4 <sup>1</sup>     | Moderate Class 2   | 7406 ± 61                               | 8483 ± 646                               |
| M44T     | Class 5 <sup>1</sup>     | Non-Class 2        | 20520 ± 250                             | 22775 ± 1128                             |
| F45L     | Class 7 <sup>1</sup>     | Non-Class 2        | 21466 ± 261                             | 23900 ± 1331                             |
| L46R     | Unclassified             | Severe Class 2     | 1575 ± 55                               | 1887 ± 86                                |
| L47R     | Class 2 <sup>4</sup>     | Moderate Class 2   | 2891 ± 92                               | 5580 ± 159                               |
| G51R     | Class 2 <sup>1,2,4</sup> | Moderate Class 2   | 6840 ± 236                              | 11251 ± 1695                             |
| G51A     | Unclassified             | Non-Class 2        | 19022 ± 278                             | 21907 ± 945                              |
| G51V     | Class 2 <sup>1,2</sup>   | Non-Class 2        | 19866 ± 375                             | 21197 ± 624                              |
| F52Y     | Unclassified             | Moderate Class 2   | 12693 ± 203                             | 16135 ± 2076                             |
| P53R     | Class 2 <sup>1,2</sup>   | Severe Class 2     | 1659 ± 75                               | 3510 ± 247                               |
| F56Y     | Unclassified             | Non-Class 2        | 16591 ± 109                             | 18485 ± 1691                             |
| L57R     | Class 2 <sup>4</sup>     | Moderate Class 2   | 2956 ± 128                              | 4650 ± 184                               |
| T58R     | Class 2 <sup>1,3,4</sup> | Non-Class 2        | 17889 ± 209                             | 22138 ± 1739                             |
| R69H     | Unclassified             | Non-Class 2        | 20184 ± 589                             | 23143 ± 999                              |
| del N73  | Unclassified             | Moderate Class 2   | 4913 ± 293                              | 11881 ± 2355                             |
| N78I     | Class 2 <sup>4</sup>     | Moderate Class 2   | 3185 ± 274                              | 4998 ± 625                               |
| V87L     | Unclassified             | Non-Class 2        | 18186 ± 779                             | 22577 ± 1112                             |
| V87D     | Class 2 <sup>1-3</sup>   | Moderate Class 2   | 3731 ± 472                              | 5216 ± 642                               |
| L88P     | Class 2 <sup>4</sup>     | Moderate Class 2   | 7799 ± 124                              | 12400 ± 2582                             |
| G89D     | Class 2 <sup>1-4</sup>   | Moderate Class 2   | 10580 ± 514                             | 9423 ± 1590                              |
| G90D     | Class 6 <sup>1</sup>     | Non-Class 2        | 21297 ± 242                             | 20572 ± 503                              |
| G90V     | Class 6 <sup>1</sup>     | Non-Class 2        | 21101 ± 268                             | 20872 ± 1098                             |
| T94I     | Class 6 <sup>1</sup>     | Non-Class 2        | 25614 ± 185                             | 24016 ± 497                              |
| V104I    | Unclassified             | Non-Class 2        | 20746 ± 333                             | 23099 ± 1134                             |
| V104F    | Unclassified             | Non-Class 2        | 17108 ± 351                             | 18678 ± 550                              |
| G106R    | Class 2 <sup>1,2</sup>   | Moderate Class 2   | 6597 ± 210                              | 8280 ± 1114                              |
| G106W    | Class 2 <sup>1-3</sup>   | Severe Class 2     | 2101 ± 99                               | 2993 ± 315                               |
| G109R    | Class 2 <sup>4</sup>     | Moderate Class 2   | 14723 ± 150                             | 13588 ± 2744                             |
| C110R    | Class 2 <sup>1</sup>     | Severe Class 2     | 1645 ± 73                               | 2062 ± 114                               |
| C110Y    | Class 2 <sup>1,2</sup>   | Severe Class 2     | 1660 ± 86                               | 2036 ± 96                                |
| C110F    | Class 2 <sup>1</sup>     | Severe Class 2     | 1571 ± 80                               | 1920 ± 127                               |
| G114D    | Unclassified             | Severe Class 2     | 1663 ± 103                              | 1958 ± 81                                |
| G114V    | Unclassified             | Severe Class 2     | 1575 ± 41                               | 2544 ± 155                               |
| E122G    | Unclassified             | Non-Class 2        | 21147 ± 314                             | 22740 ± 1211                             |

| Mutation | Prior Classification     | DMS Classification | Surface Immunostaining Intensity (Apo)* | Surface Immunostaining Intensity (+Ret)* |
|----------|--------------------------|--------------------|-----------------------------------------|------------------------------------------|
| L125R    | Class 2 <sup>1</sup>     | Non-Class 2        | 19889 ± 220                             | 18451 ± 1729                             |
| S127F    | Unclassified             | Moderate Class 2   | 2693 ± 178                              | 3591 ± 326                               |
| L131P    | Unclassified             | Severe Class 2     | 1882 ± 130                              | 3211 ± 325                               |
| R135P    | Class 3 <sup>1</sup>     | Moderate Class 2   | 8559 ± 202                              | 13039 ± 2177                             |
| R135L    | Class 2 <sup>3</sup>     | Moderate Class 2   | 4085 ± 130                              | 7931 ± 378                               |
| R135G    | Class 3 <sup>1</sup>     | Moderate Class 2   | 8791 ± 181                              | 14820 ± 2169                             |
| R135W    | Class 2 <sup>3</sup>     | Severe Class 2     | 2129 ± 65                               | 7701 ± 299                               |
| V137M    | Class 5 <sup>1</sup>     | Non-Class 2        | 20724 ± 216                             | 22958 ± 621                              |
| C140S    | Unclassified             | Non-Class 2        | 20898 ± 309                             | 23562 ± 1372                             |
| E150K    | Unclassified             | Non-Class 2        | 20855 ± 324                             | 23140 ± 993                              |
| T160T    | Unclassified             | Non-Class 2        | 20350 ± 359                             | 22847 ± 1185                             |
| W161R    | Class 2 <sup>1</sup>     | Severe Class 2     | 1812 ± 54                               | 2330 ± 231                               |
| A164E    | Class 2 <sup>1</sup>     | Severe Class 2     | 1603 ± 106                              | 2606 ± 219                               |
| A164V    | Class 2 <sup>1</sup>     | Non-Class 2        | 18661 ± 308                             | 20327 ± 713                              |
| C167R    | Class 2 <sup>1,2,4</sup> | Non-Class 2        | 20651 ± 320                             | 23214 ± 1035                             |
| C167W    | Class 2 <sup>1,4</sup>   | Severe Class 2     | 1904 ± 28                               | 3093 ± 197                               |
| A169P    | Class 2 <sup>4</sup>     | Severe Class 2     | 1475 ± 67                               | 2386 ± 119                               |
| P170R    | Unclassified             | Severe Class 2     | 1461 ± 10                               | 1926 ± 283                               |
| P171E    | Unclassified             | Severe Class 2     | 1738 ± 91                               | 2465 ± 117                               |
| P171Q    | Class 2 <sup>1</sup>     | Severe Class 2     | 1675 ± 74                               | 2429 ± 123                               |
| P171L    | Class 2 <sup>1,2</sup>   | Severe Class 2     | 1874 ± 87                               | 2679 ± 177                               |
| G174S    | Unclassified             | Non-Class 2        | 19427 ± 265                             | 23140 ± 82                               |
| S176F    | Unclassified             | Severe Class 2     | 1649 ± 36                               | 2045 ± 212                               |
| Y178N    | Class 2 <sup>1</sup>     | Severe Class 2     | 1622 ± 73                               | 2916 ± 178                               |
| Y178D    | Class 2 <sup>1</sup>     | Severe Class 2     | 1604 ± 83                               | 2142 ± 38                                |
| I179F    | Class 2 <sup>4</sup>     | Moderate Class 2   | 4667 ± 55                               | 7646 ± 964                               |
| P180A    | Class 2 <sup>4</sup>     | Moderate Class 2   | 3883 ± 159                              | 6555 ± 480                               |
| P180S    | Class 2 <sup>4</sup>     | Severe Class 2     | 1667 ± 76                               | 2127 ± 123                               |
| E181K    | Class 2 <sup>1,2</sup>   | Severe Class 2     | 1705 ± 42                               | 2236 ± 25                                |
| G182S    | Class 2 <sup>1</sup>     | Moderate Class 2   | 3154 ± 213                              | 5613 ± 471                               |
| Q184P    | Unclassified             | Severe Class 2     | 1852 ± 41                               | 2236 ± 126                               |
| C185R    | Class 2 <sup>1</sup>     | Severe Class 2     | 1816 ± 28                               | 2271 ± 319                               |
| S186P    | Class 2 <sup>2</sup>     | Severe Class 2     | 1582 ± 51                               | 1991 ± 137                               |
| S186W    | Class 2 <sup>4</sup>     | Non-Class 2        | 27766 ± 317                             | 28230 ± 875                              |
| C187Y    | Class 2 <sup>1</sup>     | Severe Class 2     | 1876 ± 64                               | 2166 ± 54                                |
| G188R    | Class 2 <sup>1,2</sup>   | Severe Class 2     | 1660 ± 66                               | 2113 ± 289                               |
| D190N    | Class 2 <sup>1</sup>     | Moderate Class 2   | 4182 ± 24                               | 5586 ± 797                               |
| D190G    | Class 2 <sup>1,3</sup>   | Severe Class 2     | 1788 ± 76                               | 2442 ± 115                               |
| D190Y    | Class 2 <sup>1,2</sup>   | Severe Class 2     | 1757 ± 98                               | 2216 ± 130                               |
| Y191C    | Unclassified             | Non-Class 2        | 17171 ± 396                             | 22547 ± 458                              |
| T193M    | Class 2 <sup>4</sup>     | Moderate Class 2   | 12826 ± 604                             | 17646 ± 1170                             |
| P196T    | Unclassified             | Non-Class 2        | 19201 ± 404                             | 22146 ± 1183                             |
| I205S    | Unclassified             | Non-Class 2        | 16477 ± 104                             | 19163 ± 538                              |
| M207K    | Unclassified             | Non-Class 2        | 18429 ± 352                             | 17930 ± 1375                             |
| M207R    | Class 2 <sup>4</sup>     | Non-Class 2        | 15790 ± 243                             | 13919 ± 804                              |

| Mutation | Prior Classification | DMS Classification | Surface Immunostaining Intensity (Apo)* | Surface Immunostaining Intensity (+Ret)* |
|----------|----------------------|--------------------|-----------------------------------------|------------------------------------------|
| V209M    | Class 7 <sup>1</sup> | Non-Class 2        | 18653 ± 98                              | 21664 ± 690                              |
| V210F    | Unclassified         | Non-Class 2        | 19755 ± 141                             | 22284 ± 776                              |
| H211R    | Class 2 <sup>1</sup> | Severe Class 2     | 1842 ± 5                                | 2237 ± 181                               |
| I214N    | Class 2 <sup>4</sup> | Non-Class 2        | 17234 ± 484                             | 19082 ± 1133                             |
| P215T    | Unclassified         | Severe Class 2     | 1521 ± 78                               | 1972 ± 215                               |
| P215L    | Unclassified         | Severe Class 2     | 2307 ± 112                              | 3037 ± 207                               |
| M216K    | Class 2 <sup>4</sup> | Non-Class 2        | 17663 ± 243                             | 20170 ± 705                              |
| M216L    | Unclassified         | Non-Class 2        | 21093 ± 31                              | 23273 ± 1180                             |
| F220C    | Class 7 <sup>1</sup> | Non-Class 2        | 19781 ± 348                             | 22066 ± 605                              |
| R252P    | Unclassified         | Non-Class 2        | 18510 ± 536                             | 20364 ± 182                              |
| del I255 | Unclassified         | Severe Class 2     | 1936 ± 36                               | 2844 ± 225                               |
| del C264 | Unclassified         | Severe Class 2     | 1994 ± 106                              | 2291 ± 53                                |
| G284S    | Unclassified         | Moderate Class 2   | 13474 ± 730                             | 14941 ± 2034                             |
| T289P    | Unclassified         | Moderate Class 2   | 2357 ± 197                              | 4688 ± 301                               |
| A295V    | Class 6 <sup>1</sup> | Non-Class 2        | 21819 ± 280                             | 22891 ± 1079                             |
| S297R    | Unclassified         | Severe Class 2     | 1638 ± 41                               | 2208 ± 185                               |
| A298D    | Unclassified         | Non-Class 2        | 17093 ± 306                             | 20131 ± 2116                             |
| K311E    | Unclassified         | Non-Class 2        | 19549 ± 358                             | 21928 ± 1173                             |
| T320N    | Unclassified         | Non-Class 2        | 20522 ± 116                             | 22270 ± 1060                             |
| L328P    | Class 1 <sup>1</sup> | Non-Class 2        | 22042 ± 342                             | 24896 ± 974                              |
| A333V    | Unclassified         | Moderate Class 2   | 12407 ± 392                             | 14555 ± 433                              |
| E341K    | Class 2 <sup>1</sup> | Non-Class 2        | 16622 ± 95                              | 17258 ± 2084                             |
| T342M    | Class 1 <sup>1</sup> | Non-Class 2        | 24656 ± 401                             | 28184 ± 1242                             |
| S343C    | Unclassified         | Non-Class 2        | 19372 ± 323                             | 21627 ± 993                              |
| Q344P    | Class 1 <sup>1</sup> | Non-Class 2        | 17471 ± 257                             | 18834 ± 1694                             |
| Q344R    | Class 1 <sup>1</sup> | Non-Class 2        | 19609 ± 277                             | 22090 ± 1221                             |
| V345M    | Class 1 <sup>1</sup> | Non-Class 2        | 21159 ± 313                             | 23618 ± 1023                             |
| V345L    | Class 1 <sup>1</sup> | Non-Class 2        | 20578 ± 243                             | 23057 ± 1079                             |
| A346P    | Class 1 <sup>1</sup> | Non-Class 2        | 20301 ± 335                             | 22845 ± 1338                             |
| P347Q    | Class 1 <sup>1</sup> | Non-Class 2        | 20697 ± 270                             | 23161 ± 1184                             |
| P347R    | Class 1 <sup>1</sup> | Non-Class 2        | 19849 ± 272                             | 22682 ± 1304                             |
| P347L    | Class 1 <sup>1</sup> | Non-Class 2        | 22253 ± 148                             | 24541 ± 869                              |
| P347A    | Class 1 <sup>1</sup> | Non-Class 2        | 18548 ± 679                             | 21170 ± 753                              |
| P347S    | Class 1 <sup>1</sup> | Non-Class 2        | 20830 ± 291                             | 23864 ± 986                              |

- [1] Athanasiou, D., Aguila, M., Bellingham, J., Li, W., McCulley, C., Reeves, P. J., and Cheetham, M. E. (2018) The molecular and cellular basis of rhodopsin retinitis pigmentosa reveals potential strategies for therapy, *Progress in Retinal and Eye Research* 62, 1-23.
- [2] Kaushal, S., and Khorana, H. G. (1994) Structure and function in rhodopsin. 7. Point mutations associated with autosomal dominant retinitis pigmentosa, *Biochemistry* 33, 6121-6128.
- [3] Sung, C. H., Schneider, B. G., Agarwal, N., Papermaster, D. S., and Nathans, J. (1991) Functional heterogeneity of mutant rhodopsins responsible for autosomal dominant retinitis pigmentosa, *Proceedings of the National Academy of Sciences* 88, 8840.
- [4] Wan, A., Place, E., Pierce, E. A., and Comander, J. (2019) Characterizing variants of unknown significance in rhodopsin: A functional genomics approach, *Human Mutation* 40, 1127-1144.
